# Supplementary material
Source: publisher figshare collection journal article supplement (https://gsajournals.figshare.com/ndownloader/files/14902559)
Supplement: Supplementary file 1 [file 14902559]

## Sheet: Table S1. 1kite_genomes_analyze
Table S1. 1kite genomes analyzed. Related to Figure 1A.
Order	Family	Lib.Identifier..ID.	Genus..Species	NOTE
Blattodea	Blaberidae	INSfrgTAVRAAPEI-41	Blaberus atropos	published, available from NCBI
Blattodea	Cryptocercidae	INSytvTCDRAAPEI-35	Cryptocercus wrighti	published, available from NCBI
Coleoptera	Gyrinidae	INSnfrTBERAAPEI-19	Gyrinus marinus	published, available from NCBI
Coleoptera	Lepiceridae	INSytvTAJRAAPEI-19	Lepicerus sp.	published, available from NCBI
Coleoptera	Staphylinidae	INShauTBERAAPEI-33	Aleochara curtula	published, available from NCBI
Collembola	Isotomidae	INSbttTIRAAPEI-18	Folsomia candida	published, available from NCBI
Collembola	Neanuridae	INSnfrTAIRAAPEI-21	Anurida maritima	published, available from NCBI
Collembola	Onychiuridae	INSjdsTAKRAAPEI-37	Tetrodontophora bielanensis	published, available from NCBI
Dermaptera	Apachyidae	INSfrgTALRAAPEI-22	Apachyus charteceus	published, available from NCBI
Dermaptera	Forficulidae	INSjdsTBNRAAPEI-89	Forficula auricularia	published, available from NCBI
Diplura	Campodeidae	INStmbTABRAAPEI-87	Campodea augens	published, available from NCBI
Diptera, Brachycera	Bombyliidae	INSbusTBKRAAPEI-76	Bombylius major	published, available from NCBI
Diptera, Brachycera	Tachinidae	INSnfrTBFRAAPEI-90	Triarthria setipennis	published, available from NCBI
Diptera, nematocerans	Bibionidae	INSbusTBCRABPEI-135	Bibio marci	published, available from NCBI
Diptera, nematocerans	Trichoceridae	INSjdsTBERAAPEI-56	Trichocera saltator	published, available from NCBI
Embioptera	Oligotomidae	INSfrgTAZRAAPEI-46	Aposthonia japonica	published, available from NCBI
Embioptera	Oligotomidae	INSytvTAHRAAPEI-17	Haploembia palaui	published, available from NCBI
Ephemeroptera	Ephemerellidae	INSytvTCERAAPEI-36	Eurylophella sp.	published, available from NCBI
Ephemeroptera	Ephemeridae	INSnfrTAKRAAPEI-30	Ephemera danica	published, available from NCBI
Ephemeroptera	Isonychiidae	INSjdsTAGRAAPEI-33	Isonychia bicolor	published, available from NCBI
Grylloblattodea	Grylloblattidae	INSfrgTAKRAAPEI-21	Galloisiana yuasai	published, available from NCBI
Grylloblattodea	Grylloblattidae	INSnfrTBKRAAPEI-9	Grylloblatta bifratrilecta	published, available from NCBI
Hemiptera, Auchenorrhyncha, Cicadomorpha	Cercopidae	INSnfrTANRAAPEI-34	Cercopis vulnerata	published, available from NCBI
Hemiptera, Coleorrhyncha	Peloridiidae	INSjdsTARRAAPEI-47	Xenophysella greensladeae	published, available from NCBI
Hemiptera, Heteroptera	Acanthosomatidae	INSnfrTAPRAAPEI-36	Acanthosoma haemorrhoidale	published, available from NCBI
Hemiptera, Heteroptera	Nepidae	INSytvTANRAAPEI-37	Ranatra linearis	published, available from NCBI
Hemiptera, Heteroptera	Veliidae	INSnfrTAORAAPEI-35	Velia caprai	published, available from NCBI
Hemiptera, Sternorrhyncha	Aleyrodidae	INSfrgTAPRAAPEI-33	Trialeurodes vaporariorum	published, available from NCBI
Hemiptera, Sternorrhyncha	Lachnidae	INSytvTBHRAAPEI-14	Essigella californica	published, available from NCBI
Hemiptera, Sternorrhyncha	Pseudococcidae	INSjdsTAIRAAPEI-35	Planococcus citri	published, available from NCBI
Hemiptera, Sternorrhyncha	Triozidae	INSytvTALRAAPEI-35	Acanthocasuarina muellerianae	published, available from NCBI
Hymenoptera	Braconidae	INSnfrTAQRAAPEI-37	Cotesia vestalis	published, available from NCBI
Hymenoptera	Chrysididae, Chrysidinae	INShauTAQRABPEI-11	Chrysis viridula	published, available from NCBI
Hymenoptera	Tenthredinidae	INSfrgTATRAAPEI-37	Tenthredo koehleri	published, available from NCBI
Isoptera	Rhinotermitidae	INSbusTBMRAAPEI-78	Prorhinotermes simplex	published, available from NCBI
Lepidoptera	Eriocraniidae	INSbusTBDRAAPEI-79	Dyseriocrania subpurpurella	published, available from NCBI
Lepidoptera	Hepialidae	INSnfrTAVRAAPEI-9	Triodia sylvina	published, available from NCBI
Lepidoptera	Lycaenidae	INShauTBGRAAPEI-35	Polyommatus icarus	published, available from NCBI
Lepidoptera	Yponomeutidae	INShauTBFRAAPEI-34	Yponomeuta evonymellus	published, available from NCBI
Lepidoptera	Zygaenidae	INSjdsTAWRAAPEI-39	Zygaena fausta	published, available from NCBI
Mantodea	Empusidae	INSfrgTASRAAPEI-36	Empusa pennata	published, available from NCBI
Mantophasmatodea	Tanzaniophasmatidae	INSfrgTBBRAAPEI-56	Tanzaniophasma sp.	published, available from NCBI
Mecoptera	Bittacidae	INSbttTARAAPEI-83	Bittacus pilicornis	published, available from NCBI
Mecoptera	Boreidae	INStmbTAWRAAPEI-13	Boreus hyemalis	published, available from NCBI
Megaloptera	Corydalidae	INSbttTKRAAPEI-18	Corydalus cornutus	published, available from NCBI
Neuroptera	Chrysopidae	INSnfrTARRAAPEI-39	Pseudomallada prasinus	published, available from NCBI
Neuroptera	Coniopterygidae	INSjdsTBQRAAPEI-94	Conwentzia psociformis	published, available from NCBI
Neuroptera	Myrmeleontidae	INSjdsTATRAAPEI-57	Euroleon nostras	published, available from NCBI
Odonata, Anisoptera	Cordulegastridae	INSjdsTBHRAAPEI-74	Cordulegaster boltonii	published, available from NCBI
Odonata, Anisozygoptera	Epiophlebiidae	INSfrgTAHRAAPEI-18	Epiophlebia superstes	published, available from NCBI
Odonata, Zygoptera	Calopterygidae	INStmbTAARAAPEI-84	Calopteryx splendens	published, available from NCBI
Orthoptera, Caelifera	Acrididae	INSnfrTAMRAAPEI-33	Stenobothrus lineatus	published, available from NCBI
Orthoptera, Caelifera	Proscopiidae	INStmbTBCRBAPEI-33	Prosarthria teretrirostris	published, available from NCBI
Orthoptera, Caelifera	Tetrigidae	INShauTANRAAPEI-95	Tetrix subulata	published, available from NCBI
Orthoptera, Ensifera	Gryllotalpidae	INSfrgTAXRABPEI-44	Gryllotalpa sp.	published, available from NCBI
Orthoptera, Ensifera	Rhaphidophoridae	INSnfrTBIRAAPEI-95	Ceuthophilus sp.	published, available from NCBI
Phasmatodea	Heteropterygidae	INStmbTBERAAPEI-30	Aretaon asperrimus	published, available from NCBI
Phasmatodea	Phasmatidae	INSerlTASRAAPEI-136	Clitarchus hookeri	published, available from NCBI
Phasmatodea	Pseudophasmatidae	INSfrgTAORAAPEI-33	Peruphasma schultei	published, available from NCBI
Phasmatodea	Timemidae	INSnfrTBPRAAPEI-15	Timema cristinae	published, available from NCBI
Plecoptera	Eustheniidae	INStmbTBFRAAPEI-31	Cosmioperla kuna	published, available from NCBI
Protura	Acerentomidae	INSjdsTAHRAAPEI-34	Acerentomon sp.	published, available from NCBI
Psocodea, Psocomorpha	Ectopsocidae	INSytvTCFRAAPEI-37	Ectopsocus briggsi	published, available from NCBI
Psocodea, Troctomorpha	Liposcelididae	INStmbTBGRAAPEI-33	Liposcelis bostrychophila	published, available from NCBI
Raphidioptera	Inocelliidae	INSytvTCFRAAPEI-43	Inocellia crassicornis	published, available from NCBI
Raphidioptera	Raphidiidae	INSnfrTAGRAAPEI-19	Xanthostigma xanthostigma	published, available from NCBI
Siphonaptera	Ceratophyllidae	INSnfrTBARAAPEI-15	Ceratophyllus gallinae	published, available from NCBI
Siphonaptera	Pulicidae	INStmbTAYRAAPEI-17	Ctenocephalides felis	published, available from NCBI
Strepsiptera	Stylopidae	INSytvTBKRAAPEI-43	Stylops melittae	published, available from NCBI
Thysanoptera	Phlaeothripidae	INSjdsTADRAAPEI-22	Gynaikothrips ficorum	published, available from NCBI
Thysanoptera	Thripidae	INSjdsTABRAAPEI-20	Frankliniella cephalica	published, available from NCBI
Thysanoptera	Thripidae	INSjdsTACRAAPEI-21	Thrips palmi	published, available from NCBI
Trichoptera	Hydroptilidae	INSpmbTALRAAPEI-210	Hydroptila sp.	published, available from NCBI
Trichoptera	Limnephilidae	INSbttTARAAPEI-9	Platycentropus radiatus	published, available from NCBI
Trichoptera	Rhyacophilidae	INSjdsTBSRAAPEI-9	Rhyacophila fasciata	published, available from NCBI
Zoraptera	Zorotypidae	INSjdsTAQRAAPEI-46	Zorotypus caudelli	published, available from NCBI
Zygentoma	Ateluridae	INSjdsTAVRAAPEI-37	Atelura formicaria	published, available from NCBI
Zygentoma	Lepidotrichidae	INSbttTJRAAPEI-19	Tricholepidion gertschi	published, available from NCBI
Zygentoma	Lepismatidae	INSbttTSRAAPEI-29	Thermobia domestica	published, available from NCBI
